# Supplementary material for: High-recovery sorting of cancer cells from whole blood via periodic-focusing inertial microchip
Source: Royal Society of Chemistry journal article supplement (doi:10.1039/d2an01310j), 2022-01-01
Supplement: d2an01310j1.pdf [file d2an01310j1.pdf]

## Supporting Information

### High-Recovery Sorting of Small Lung Cancer Cells from Whole Blood via a Periodic-Focusing Inertial Microchip

Xiao Li, Yijia Yang, Sarah C. Villareal, Kitiara Griffin, and Dimitri Pappas\*

Department of Chemistry and Biochemistry, Texas Tech University, Lubbock, TX, 79409, US

\*E-mail: [d.pappas@ttu.edu](mailto:d.pappas@ttu.edu)

\*Phone: 806-834-1103

\*Fax: 806-742-1289

\*Corresponding author

## **Supporting material contents:**

**Section S1.** Blood lysing protocol.

**Section S2.** Flow cytometry analysis.

**Table S1.** Size distribution of A549 CTCs and comparison with other adherent cancer cell lines.

**Table S2.** Chip parameters.

**Table S3.** Data details.

**Figure S1.** Numerical method mesh images.

**Figure S2.** Schematic illustration for separating rare tumor cells from whole blood.

**Figure S3.** Flow rate optimization.

**Figure S4.** Cell viability control.

**Supplementary Video 1.** 13  $\mu\text{m}$  particles flowed in the inertial microfluidic channel near the outlets at 609  $\mu\text{L}/\text{min}$  flow rate.

**Supplementary Video 2.** 4  $\mu\text{m}$  particles flowed in the inertial microfluidic channel near the outlets at 609  $\mu\text{L}/\text{min}$  flow rate.

**Supplementary Video 3.** 100 X diluted whole blood and lung cancer cells (A549 cells) flowed in the inertial microfluidic channel near the outlets at 609  $\mu\text{L}/\text{min}$  flow rate.

**Supplementary Video 4.** 100 X diluted whole blood flowed in the inertial microfluidic channel near the outlets at 609  $\mu\text{L}/\text{min}$  flow rate.

**Supplementary Video 5.** White blood cells (WBCs) and lung cancer cells (A549 cells) flowed in the inertial microfluidic channel near the outlets at 609  $\mu\text{L}/\text{min}$  flow rate.

**Supporting information section 1: blood lysing protocol.**

Commercial whole blood was gently shaken to be homogeneous prior to use. For lysing erythrocytes, 900  $\mu\text{L}$  distilled water was added to 100  $\mu\text{L}$  whole blood for 30 s. Immediately afterward, 110  $\mu\text{L}$  of 80 g/mL NaCl solution was added to restore osmolarity. Blood mixture was then centrifuged at 4500 rpm for 5 min, supernatant was discarded to remove lysed erythrocytes.

**Supporting information section 2: flow cytometry analysis.**

Flow cytometer (FACSCalibur, Becton-Dicknson) was used for particle distribution analysis after particle characterization experiments. All particles were detected directly without any further modification. Original samples and sorted samples collected from all outlets were analyzed by counting at least 10,000 cells.

**Supporting information Table S1: Chip parameters.**

| <b>Parameters</b>   |                   |
|---------------------|-------------------|
| <b>Radius</b>       | 500 $\mu\text{m}$ |
| <b>Width</b>        | 240 $\mu\text{m}$ |
| <b>Height</b>       | 50 $\mu\text{m}$  |
| <b>Total length</b> | 5.5 cm            |
| <b>contractions</b> | 110 $\mu\text{m}$ |

**Figure S1. ANSYS fluent mesh images.**

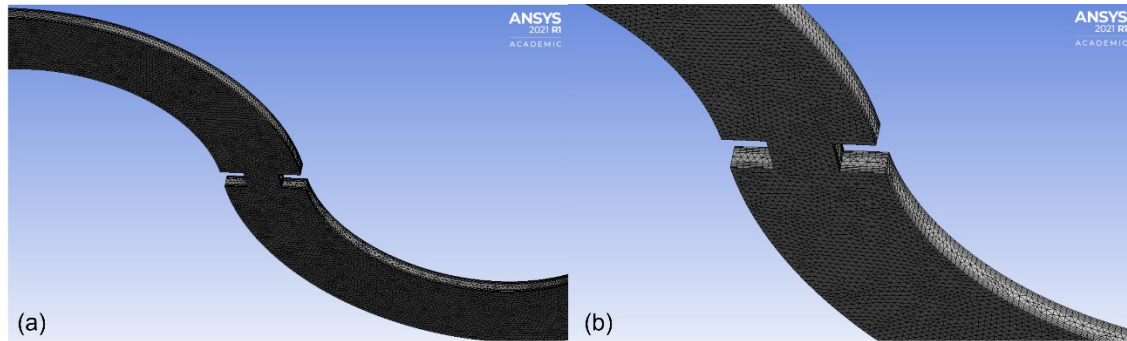

Figure S1 graph (a) illustrates the ANSYS fluent meshes near contractions and graph (b) is magnifying meshes near one contraction for visualization purpose.

**Figure S2. Schematic illustration for separating rare tumor cells from whole blood.**

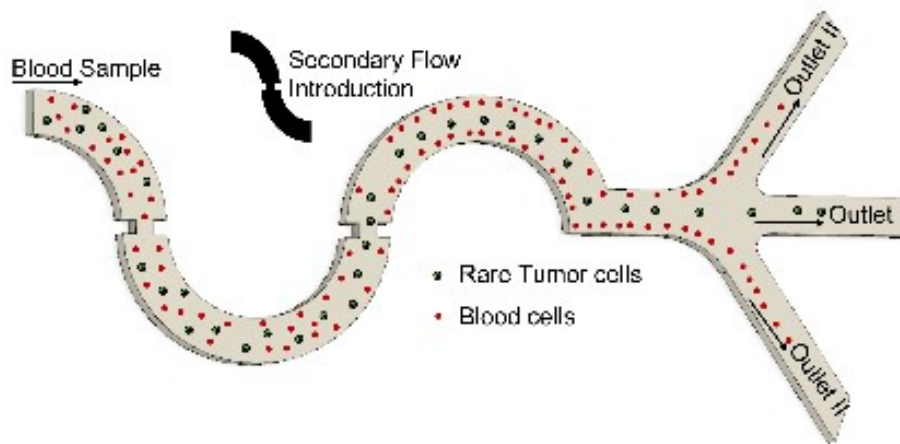

Figure S2 demonstrates the trajectories of two cells (rare tumor cells and blood cells) at Outlet I and Outlet II. Green particles which represent tumor cells will be focused in the middle of the channel

after passing through the serpentine channel and exit from Outlet I and Red particles which represent red blood cells will be focused next to the side of the channel and flow out from Outlet II.

**Figure S3. Flow rate optimization.**

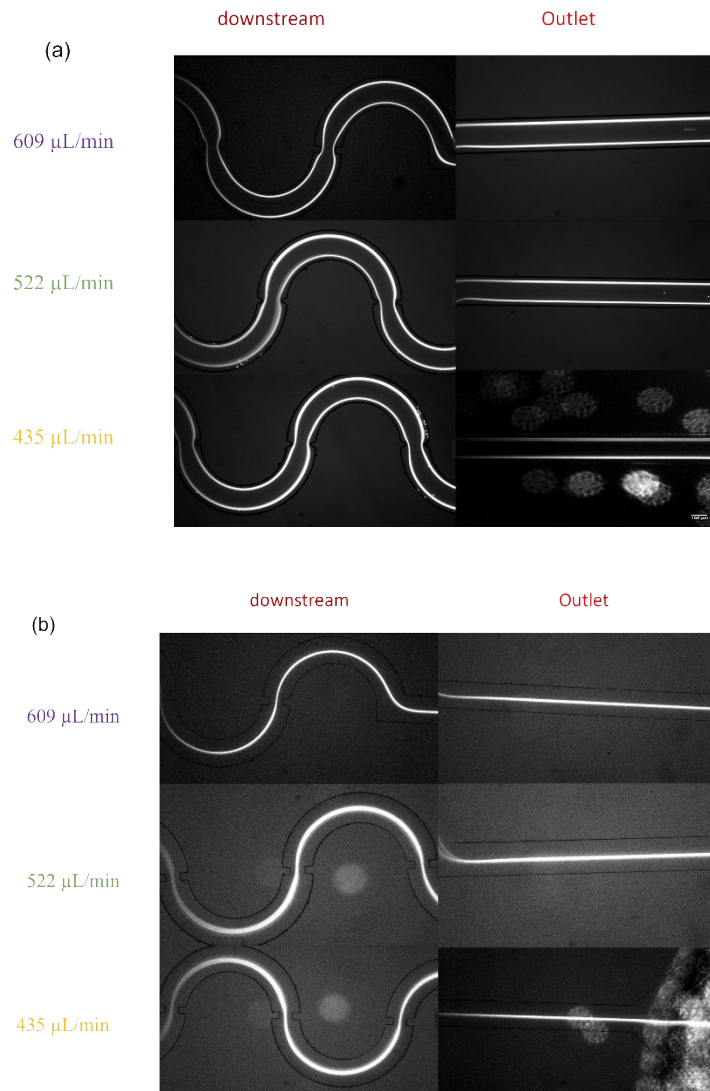

Figure S3 (a) Fluorescence images of 4 μm particles at representative positions. (b) Fluorescence images of 13 μm particles at different positions. Scale bar is 100 μm.

Flow rate optimization was studied using 4 and 13 μm polystyrene beads by using flow rate 435 μL/min, 522 μL/min, and 609 μL/min which corresponding to the Reynolds number 50, 60

and 70. No differences in trajectories could be observed under microscope for 4 or 13  $\mu\text{m}$  polystyrene beads for different flow rate. The back pressure resulted in some of the chip leaking when 698  $\mu\text{L}/\text{min}$  ( $R_e = 80$ ) was applied. Therefore, considering the throughput cancer cells can stand and chip leaking, 609  $\mu\text{L}/\text{min}$  was chosen for following tumor cell study.

**Figure S4. Cell viability control.**

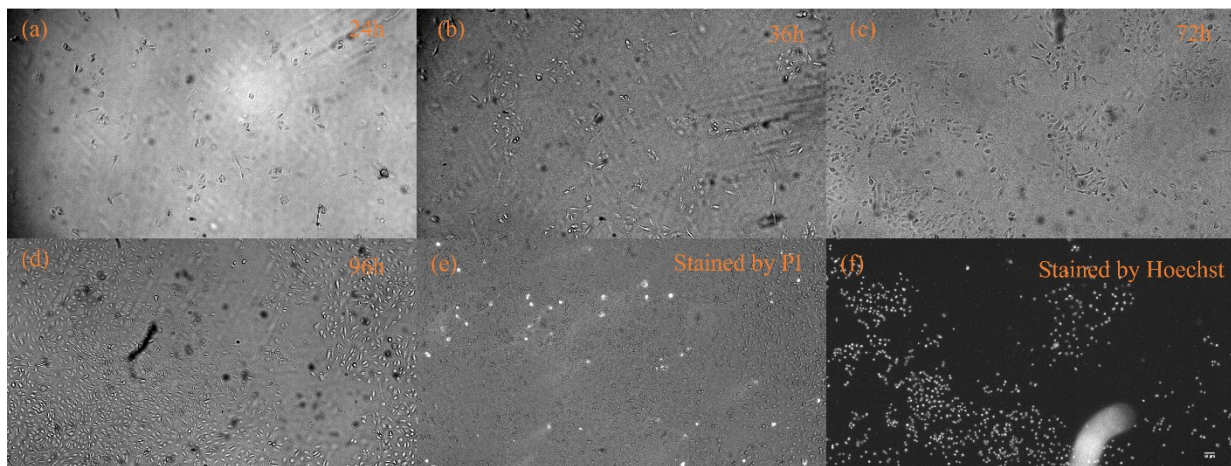

**Figure S4.** (a-d) Microscopic images of the re-cultured tumor cells 24, 36, 72 and 96 h. (e) 96h cultured A549 cells were stained with PI and fluorescence cells are dead cells. (f) 96 h cultured A549 cells were stained with Hoechst to calculate cell viabilities (same position with picture taken for graph (e)). As shown graph e and f, 94.2% of the cells maintained the desired proliferation capacity and viability after cultured 96 h under the same condition described in method part.

## References

1. Nath, B.; Raza, A.; Sethi, V.; Dalal, A.; Ghosh, S. S.; Biswas, G., Understanding flow dynamics, viability and metastatic potency of cervical cancer (HeLa) cells through constricted microchannel. *Scientific reports* **2018**, *8* (1), 1-10.

2. Moon, H.-S.; Kwon, K.; Hyun, K.-A.; Seok Sim, T.; Chan Park, J.; Lee, J.-G.; Jung, H.-I., Continual collection and re-separation of circulating tumor cells from blood using multi-stage multi-orifice flow fractionation. *Biomicrofluidics* **2013**, *7* (1), 014105.
3. Connolly, S.; McGourty, K.; Newport, D., The in vitro inertial positions and viability of cells in suspension under different in vivo flow conditions. *Scientific reports* **2020**, *10* (1), 1-13.
